# Supplementary material for: Highly efficient and thermally robust cyan-green phosphor-in-glass films for high-brightness laser lighting
Source: Royal Society of Chemistry journal article supplement (doi:10.1039/d1tc02551a), 2021-01-01
Supplement: d1tc02551a1.pdf [file d1tc02551a1.pdf]

**Supplemental materials for “Highly efficient and thermally robust cyan-green phosphor-in-glass film for high-brightness laser lighting ”**

Huajun Wu<sup>a</sup>, Guo-Hui Pan<sup>a</sup>, Zhendong Hao<sup>a,\*</sup>, Liangliang Zhang<sup>a</sup>, Hao Wu<sup>a</sup>, Jiahua Zhang<sup>a,b\*</sup>

<sup>a</sup> State Key Laboratory of Luminescence and Applications, Changchun Institute of Optics, Fine Mechanics and Physics, Chinese Academy of Sciences, 3888 Eastern South Lake Road, Changchun, 130033, China

<sup>b</sup> Center of Materials Science and Optoelectronics Engineering, University of Chinese Academy of Sciences, Beijing, 100049, China

---

\* Corresponding authors.

Fax: +86-431-8617-6317

E-mail address: haozd@ciomp.ac.cn (Zhendong Hao); zhangjh@ciomp.ac.cn (Jiahua Zhang)

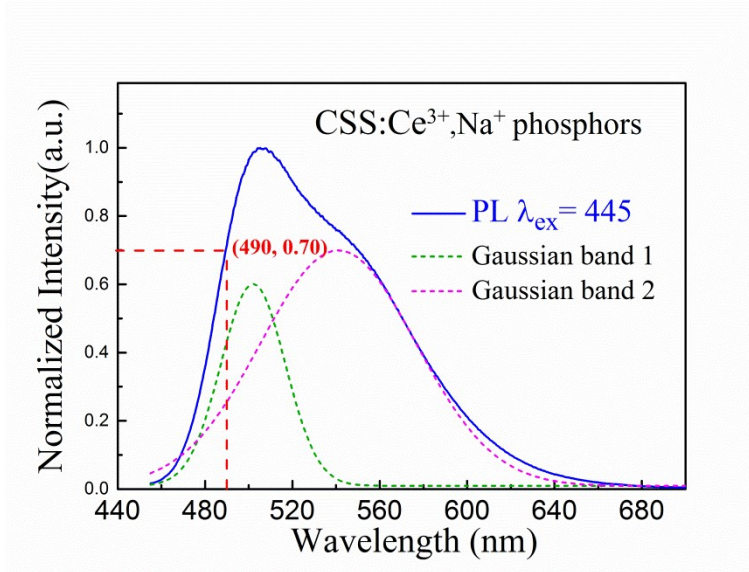

Fig. S1 The ratio of PL intensity at 490 nm to 514 nm for CSS:Ce<sup>3+</sup>,Na<sup>+</sup> phosphors; Gaussian fitting into two emission bands 502 nm and 543 nm

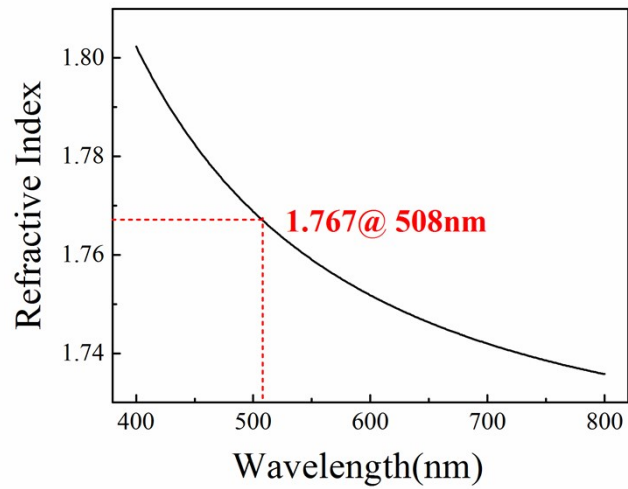

Fig. S2 Dispersion of refractive index of borosilicate glass measured using ellipsometry

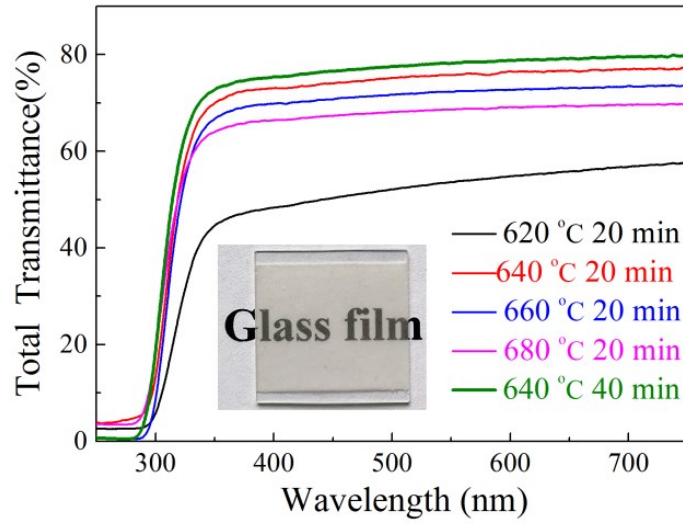

Fig. S3 Total transmittance spectrum of the Glass Film ( $\sim 73\mu\text{m}$ ) prepared with different sintering parameter; insert is the photographs of the glass film sintered at  $640^\circ\text{C}$  for 40 min

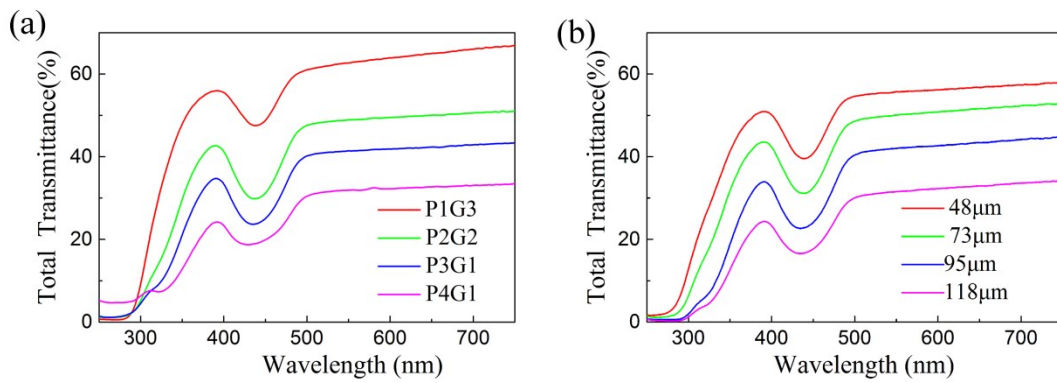

Fig. S4 Total transmittance spectra of the film with (a) various PiG ratios ( $\sim 73\mu\text{m}$ ) and (b) various film thickness (P2G3)

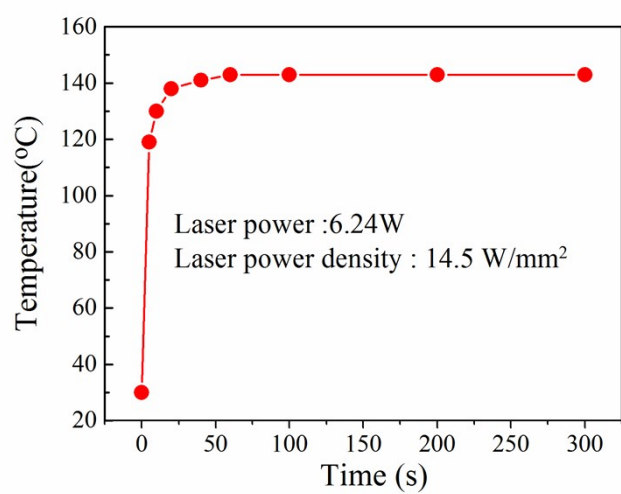

Fig. S5 Surface temperature of the CSS-PiG film under 14.5 W/mm<sup>2</sup> laser excitation

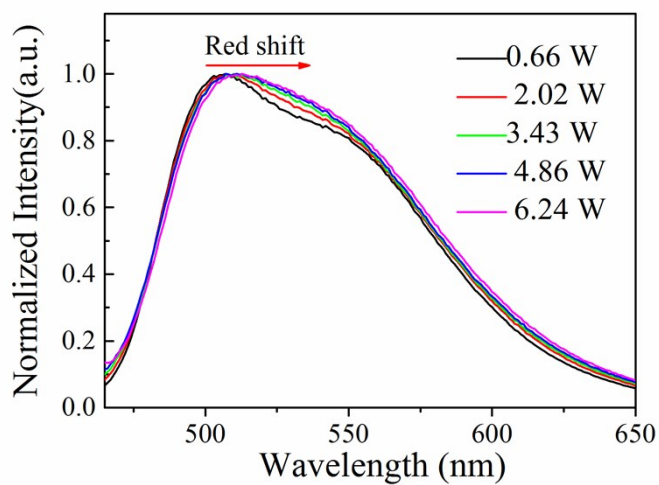

Fig. S6 Normalized emission spectra of the CSS-PiG film pumped by varying incident laser power

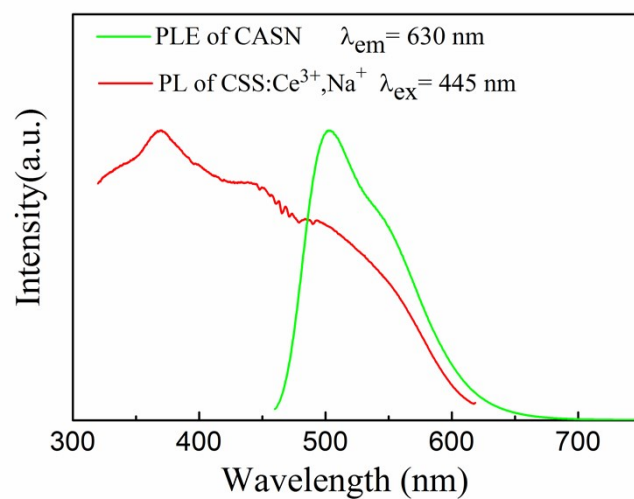

Fig. S7 Emission spectrum of the CSS:Ce<sup>3+</sup>,Na<sup>+</sup> phosphors; Excitation spectrum of the CaAlSiN<sub>3</sub>:Eu<sup>2+</sup> phosphors
